# Supplementary material for: Modulating adsorbed hydrogen drives electrochemical CO2-to-C2 products
Source: PubMed Central journal article supplement (PMC10394046; doi:10.1038/s41467-023-40412-9), 2023-08-01
Supplement: 41467_2023_40412_MOESM1_ESM.pdf [file 41467_2023_40412_MOESM1_ESM.pdf]

Supplementary Information for

## **Modulating Adsorbed Hydrogen Drives Electrochemical CO<sub>2</sub>-to-C<sub>2</sub> Products**

Jiaqi Feng, Libing Zhang, Shoujie Liu, Liang Xu, Xiaodong Ma, Xingxing Tan, Limin Wu, Qingli Qian, Tianbin Wu, Jianling Zhang, Xiaofu Sun\*, Buxing Han\*

## Supplementary Figures and Tables

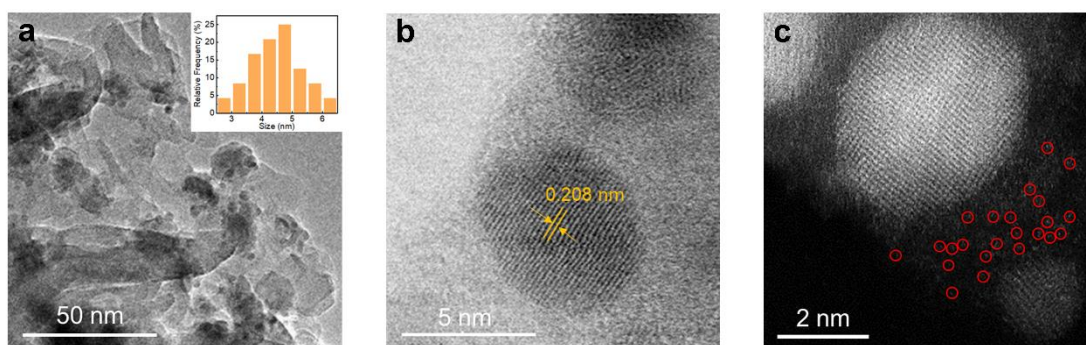

**Figure S1.** (a) TEM image (inset shows particle size distribution), (b) HRTEM image and (c) aberration-corrected HAADF-STEM image of P-Cu<sub>1</sub>/Cu<sub>NP</sub>.

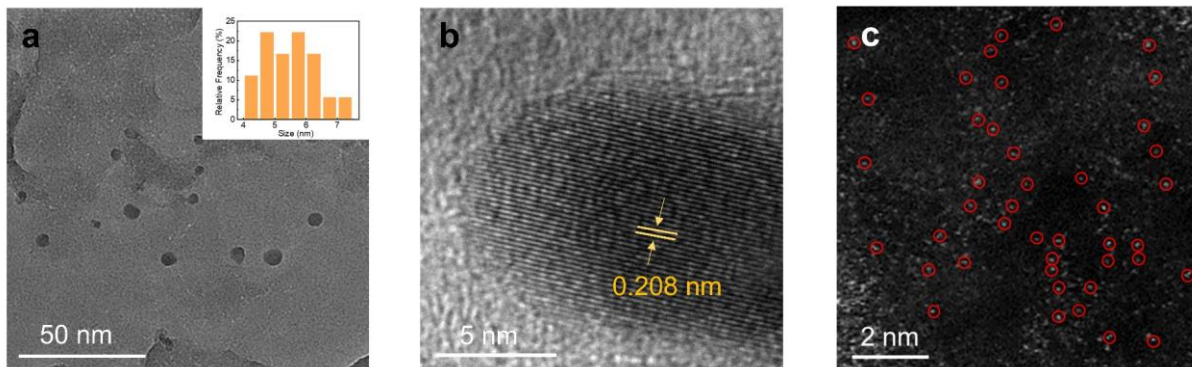

**Figure S2.** (a) TEM image (inset shows particle size distribution), (b) HRTEM image and (c) aberration-corrected HAADF-STEM image of R-Cu<sub>1</sub>/Cu<sub>NP</sub>.

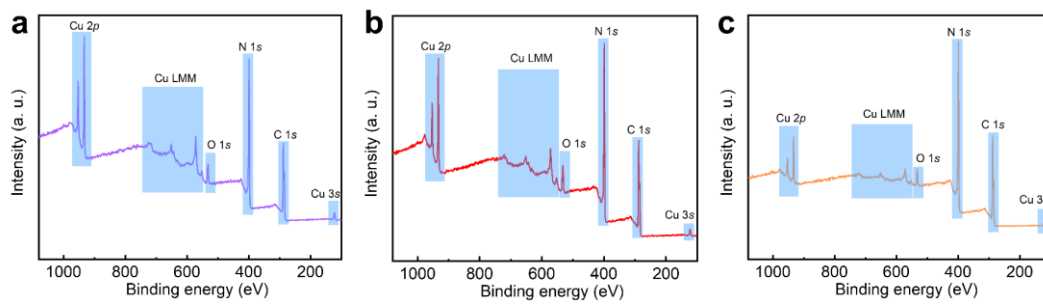

**Figure S3.** XPS survey spectra of (a) P-Cu<sub>1</sub>/Cu<sub>NP</sub>, (b) M-Cu<sub>1</sub>/Cu<sub>NP</sub> and (c) R-Cu<sub>1</sub>/Cu<sub>NP</sub>.

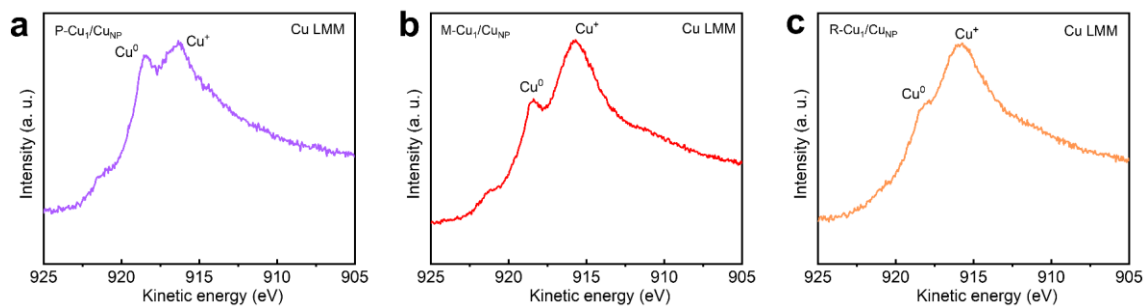

**Figure S4.** Cu Auger LMM spectra of (a) P-Cu<sub>1</sub>/Cu<sub>NP</sub>, (b) M-Cu<sub>1</sub>/Cu<sub>NP</sub> and (c) R-Cu<sub>1</sub>/Cu<sub>NP</sub>.

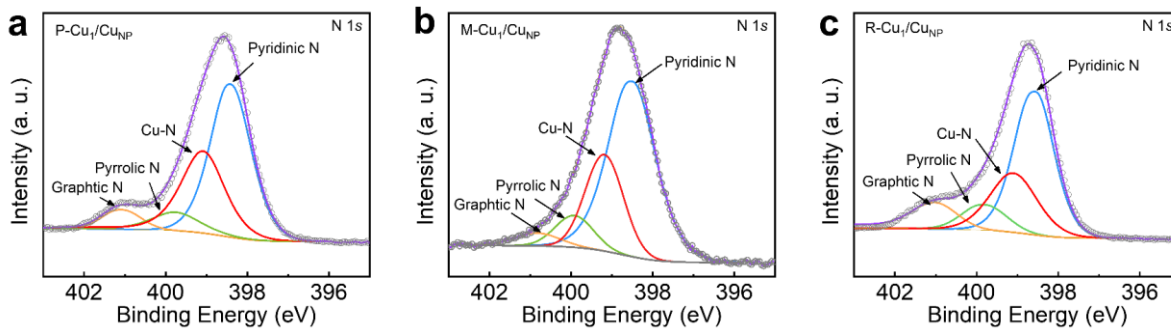

**Figure S5.** XPS spectra of N 1s orbits of (a) P-Cu<sub>1</sub>/Cu<sub>NP</sub>, (b) M-Cu<sub>1</sub>/Cu<sub>NP</sub>, and (c) R-Cu<sub>1</sub>/Cu<sub>NP</sub>.

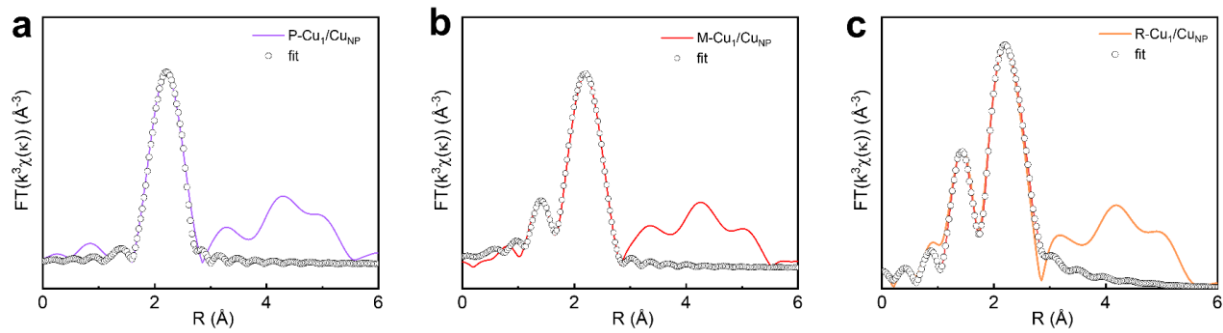

**Figure S6.** Least-squares EXAFS fittings of (a) P-Cu<sub>1</sub>/Cu<sub>NP</sub>, (b) M-Cu<sub>1</sub>/Cu<sub>NP</sub>, and (c) R-Cu<sub>1</sub>/Cu<sub>NP</sub>.

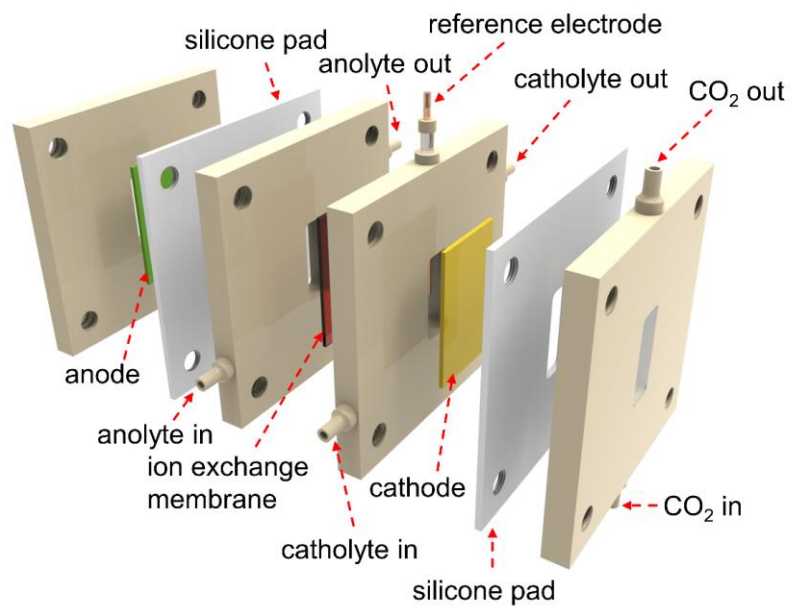

**Figure S7.** The scheme of flow cell used for CO<sub>2</sub>RR tests.



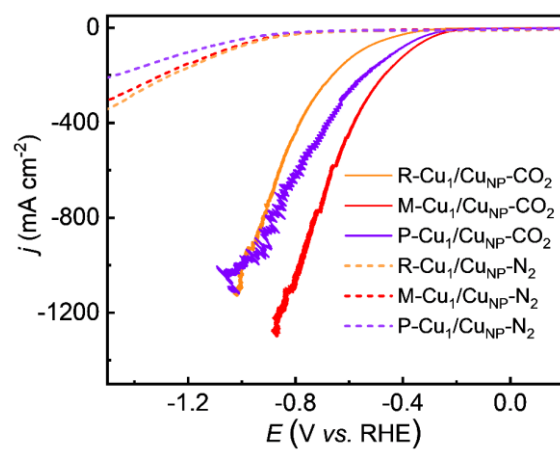

**Figure S8.** LSV curves of R-Cu<sub>1</sub>/Cu<sub>NP</sub>, M-Cu<sub>1</sub>/Cu<sub>NP</sub> and P-Cu<sub>1</sub>/Cu<sub>NP</sub> in CO<sub>2</sub> or N<sub>2</sub> atmosphere, the experiments were performed in 5 M KOH electrolyte with 20 mV s<sup>-1</sup> scan rate and 80% ohmic compensation.

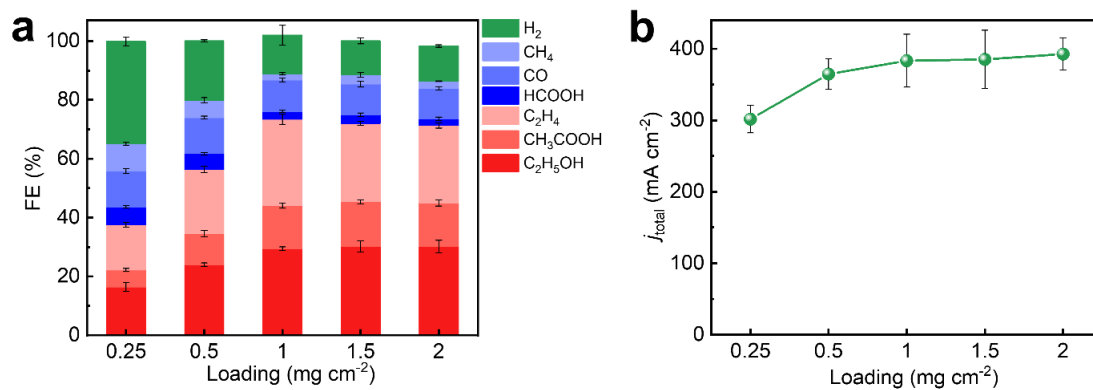

**Figure S9.** (a) Product FEs and (b) current density of M-Cu<sub>1</sub>/Cu<sub>NP</sub> at -0.6V in 5 M KOH electrolyte with various catalyst loading. Both C<sub>2</sub> products selectivity and total current density increased as the increasing loading of M-Cu<sub>1</sub>/Cu<sub>NP</sub> until 1 mg cm<sup>-2</sup>, and no obvious difference was observed among 1, 1.5 and 2 mg cm<sup>-2</sup>. Therefore, we chose 1 mg cm<sup>-2</sup> as the catalyst loading to conduct activity experiments.

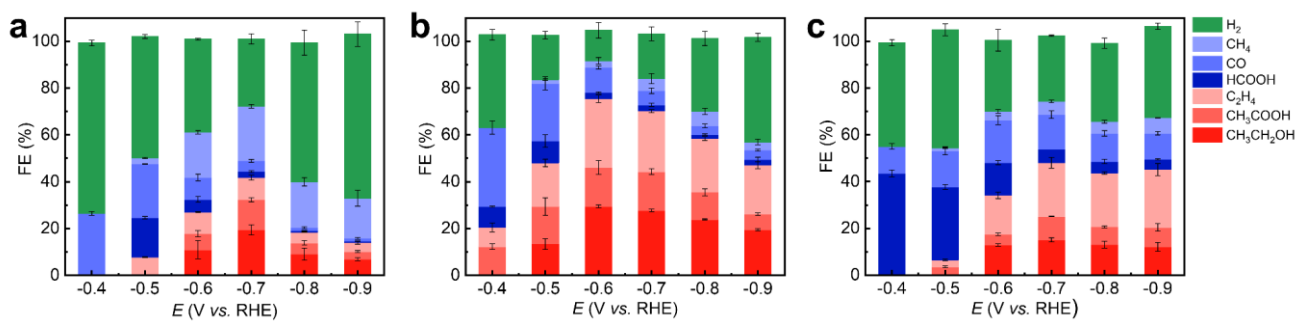

**Figure S10.** The CO<sub>2</sub>RR product FEs of (a) R-Cu<sub>1</sub>/Cu<sub>NP</sub>, (b) M-Cu<sub>1</sub>/Cu<sub>NP</sub> and (c) P-Cu<sub>1</sub>/Cu<sub>NP</sub> under different applied potentials, the experiments were performed in 5 M KOH electrolyte with 80% ohmic compensation. Values are means and error bars indicate s.d. ( $n = 3$  replicates).

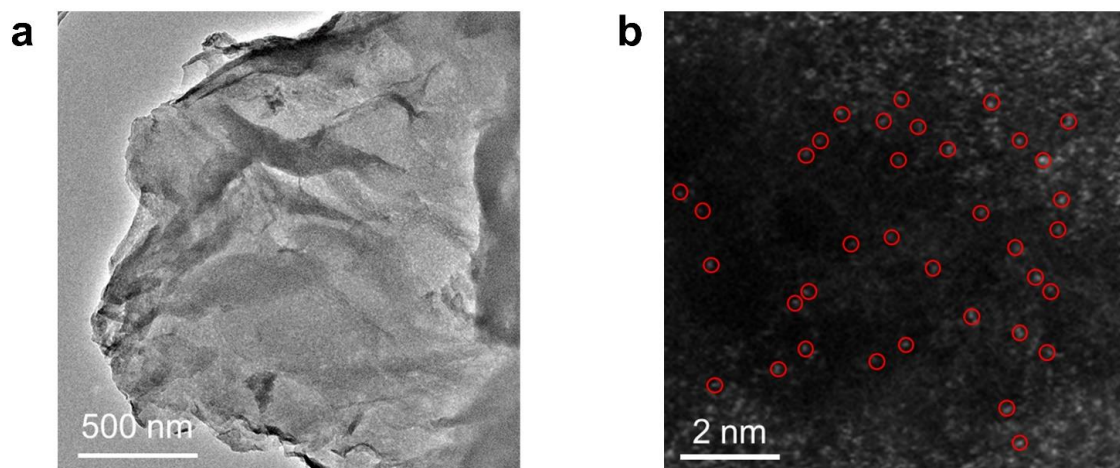

**Figure S11.** (a) TEM and (b) aberration-corrected HAADF-STEM images of Cu-N-C. The Cu-N-C was obtained by acid treatment of M-Cu<sub>1</sub>/Cu<sub>NP</sub>: the M-Cu<sub>1</sub>/Cu<sub>NP</sub> was added into 50 mL 1 M sulfuric acid aqueous solution and heated at 80 °C for 48 h, then washed with deionized water several times and dried at 80°C overnight.

No obvious nanoparticles were observed in TEM image and a large amount of isolated bright dots recognized as Cu single atoms were observed in aberration-corrected HAADF-STEM image.

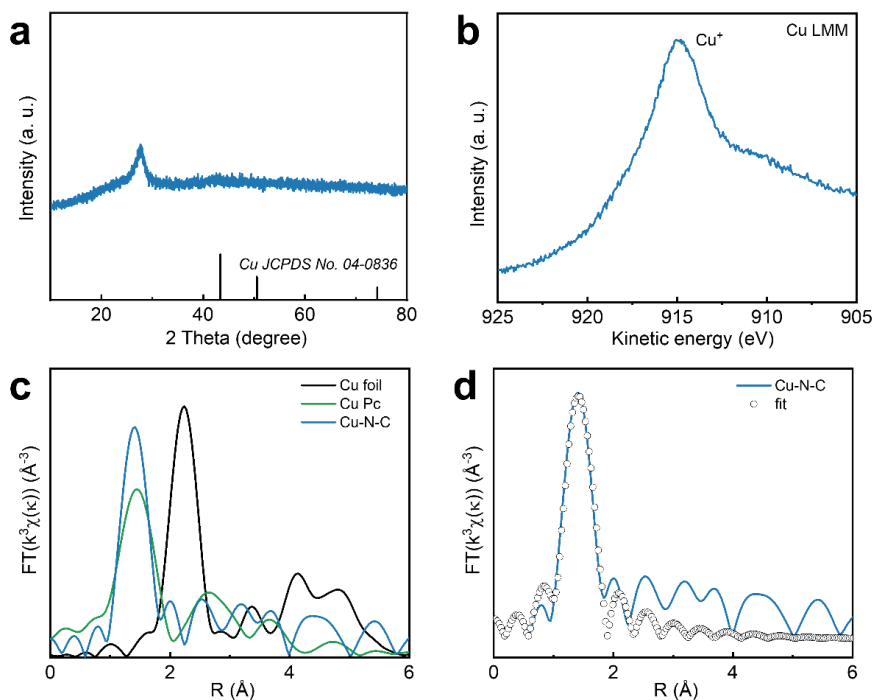

**Figure S12.** (a) XRD pattern, (b) Cu Auger LMM spectrum, (c) EXAFS spectra, and (d) least-squares EXAFS fittings of Cu-N-C. The Cu-N-C was obtained by acid treatment of M-Cu<sub>1</sub>/Cu<sub>NP</sub>: the M-Cu<sub>1</sub>/Cu<sub>NP</sub> was added into 50 mL 1 M sulfuric acid aqueous solution and heated at 80 °C for 48 h, then washed with deionized water several times and dried at 80°C overnight.

No diffraction peaks related to crystalline Cu species can be identified in XRD pattern. XPS spectra showed that Cu element existed in Cu-N-C catalyst and Cu<sup>+</sup> was main specie. More importantly, the EXAFS profiles in the R-space of Cu-N-C suggested that only the peak attributed to Cu-N coordination located at around 1.4 Å, while the Cu-Cu coordination peak at around 2.2 Å disappeared, which confirmed that the Cu species only existed as single atom form. The results of least-squares EXAFS fitting confirmed that the Cu-N coordination numbers in Cu-N-C was 4.0 (Table S2), implying that the atomic Cu species mainly existed as Cu-N<sub>4</sub> structure.

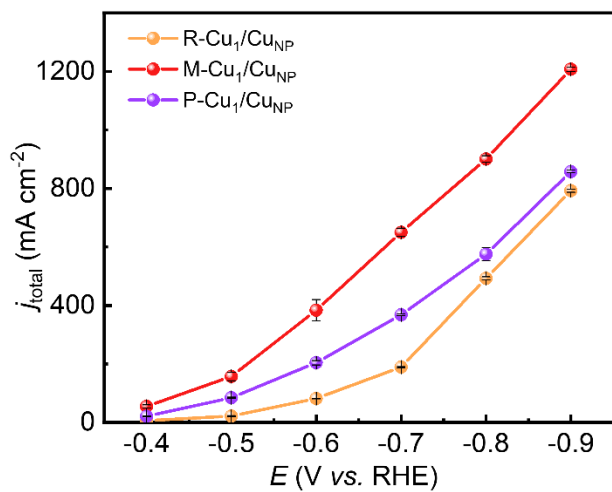

**Figure S13.** Total current density of R-Cu<sub>1</sub>/Cu<sub>NP</sub>, M-Cu<sub>1</sub>/Cu<sub>NP</sub> and P-Cu<sub>1</sub>/Cu<sub>NP</sub> at different applied potentials in 5 M KOH electrolyte. Values are means and error bars indicate s.d. ( $n = 3$  replicates).

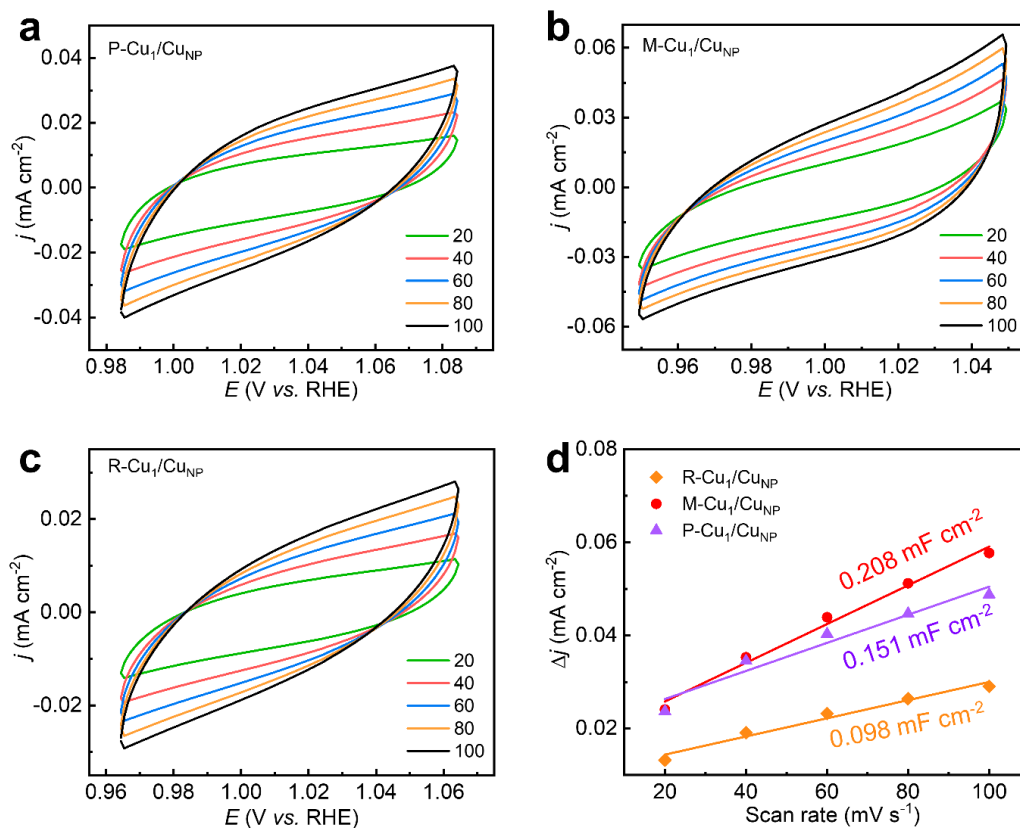

**Figure S14.** Cyclic voltammograms with different scan rates (20, 40, 60, 80, 100 mV s<sup>-1</sup>) for (a) P-Cu<sub>1</sub>/Cu<sub>NP</sub>, (b) M-Cu<sub>1</sub>/Cu<sub>NP</sub>, and (c) R-Cu<sub>1</sub>/Cu<sub>NP</sub> in 0.5 M KHCO<sub>3</sub> electrolyte. (d) Linear fitting of double-layer capacitive currents  $\Delta j$  versus scan rate.

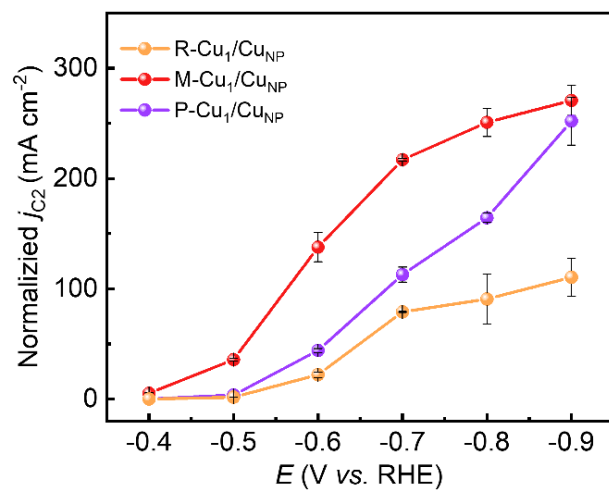

**Figure S15.** The  $j_{C_2}$  of R-Cu<sub>1</sub>/Cu<sub>NP</sub>, M-Cu<sub>1</sub>/Cu<sub>NP</sub> and P-Cu<sub>1</sub>/Cu<sub>NP</sub> after normalized by ECSA in 5 M KOH electrolyte.



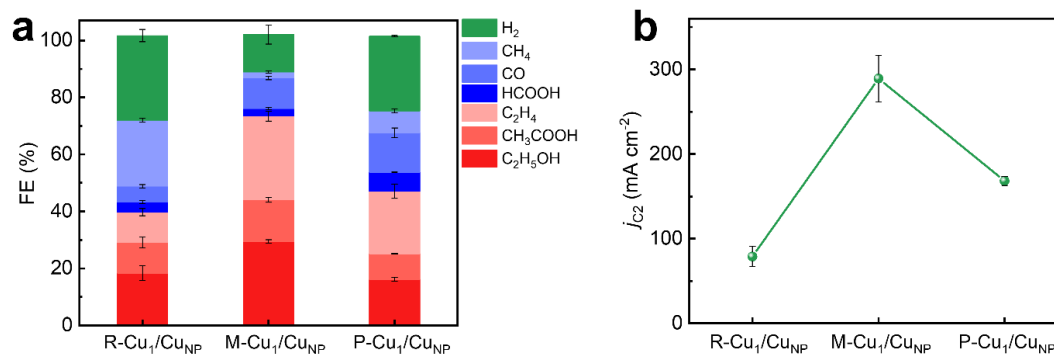

**Figure S16.** The (a) products FE and (b)  $j_{C_2}$  of R-Cu<sub>1</sub>/Cu<sub>NP</sub>, M-Cu<sub>1</sub>/Cu<sub>NP</sub> and P-Cu<sub>1</sub>/Cu<sub>NP</sub> under similar ECSA condition in 5 M KOH electrolyte.

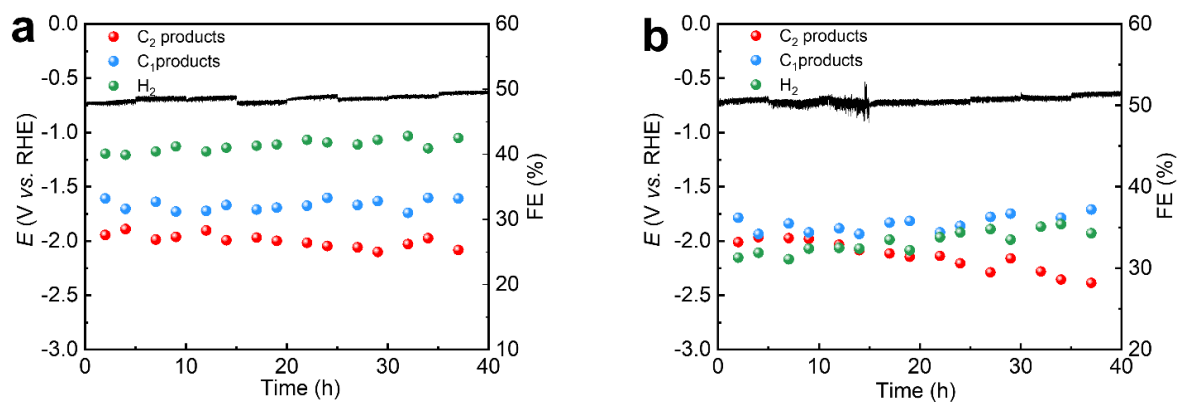

**Figure S17.** Long-term stability of (a) R-Cu<sub>1</sub>/Cu<sub>NP</sub> at a constant current density of 200 mA cm<sup>-2</sup> and (b) P-Cu<sub>1</sub>/Cu<sub>NP</sub> at a constant current density of 400 mA cm<sup>-2</sup> in 5 M KOH electrolyte (the electrode was washed, then dried and the electrolyte was refreshed at intervals 5 h to address the issues of flooding and carbonation).

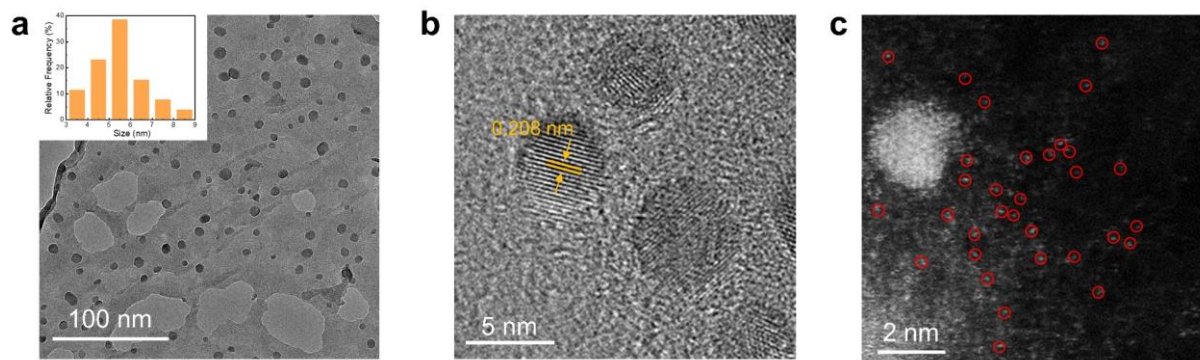

**Figure S18.** (a) TEM image (inset shows particle size distribution), (b) HRTEM image and (c) aberration-corrected HAADF-STEM image of M-Cu<sub>1</sub>/Cu<sub>NP</sub> after 40 h electrolysis.

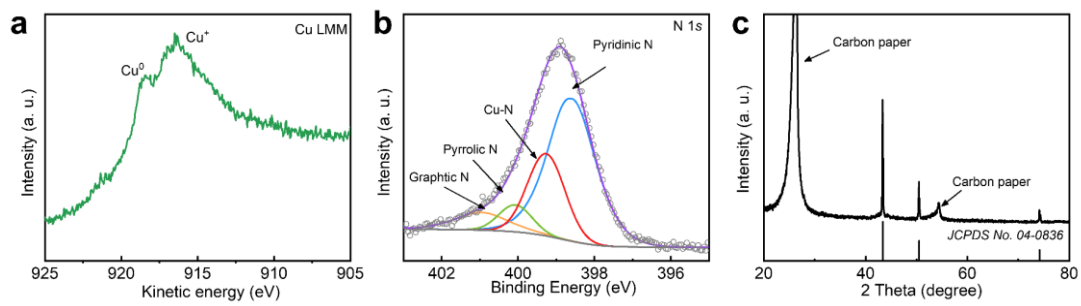

**Figure S19.** (a) Cu Auger LMM spectrum (b) XPS spectra of N  $1s$  orbits and (c) XRD pattern of M-Cu<sub>1</sub>/Cu<sub>NP</sub> after 40 h electrolysis.

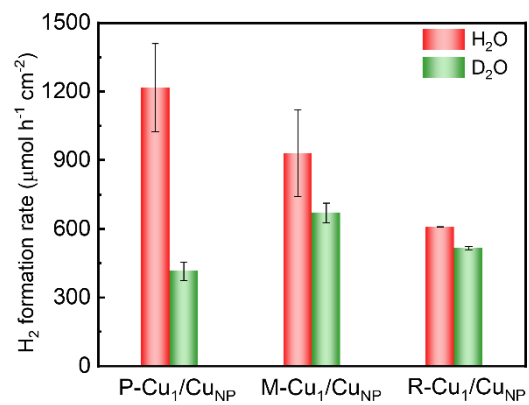

**Figure S20.** The kinetic isotope effect of H<sub>2</sub>O/D<sub>2</sub>O on P-Cu<sub>1</sub>/Cu<sub>NP</sub> M-Cu<sub>1</sub>/Cu<sub>NP</sub> and R-Cu<sub>1</sub>/Cu<sub>NP</sub> at -0.6 V in flow cell with 5 M KOH electrolyte. Values are means and error bars indicate s.d. ( $n = 3$  replicates).

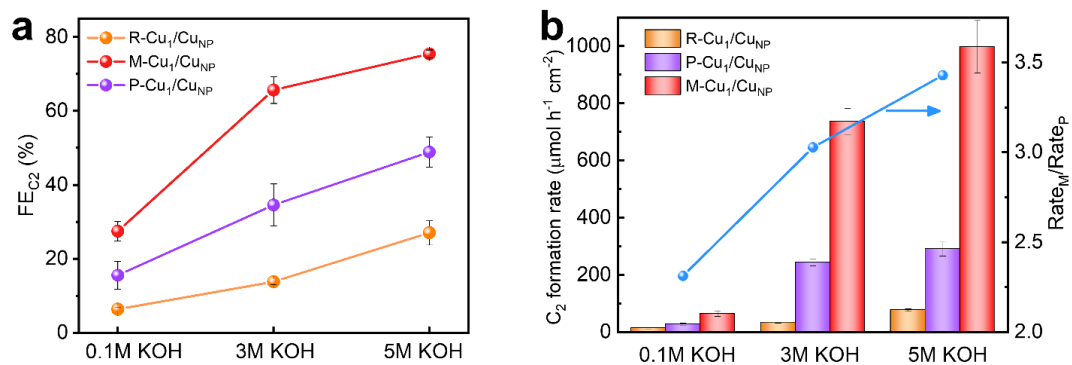

**Figure S21.** (a) FE<sub>C2</sub> of R-Cu<sub>1</sub>/Cu<sub>NP</sub>, M-Cu<sub>1</sub>/Cu<sub>NP</sub> and P-Cu<sub>1</sub>/Cu<sub>NP</sub> in different concentrations KOH electrolyte at -0.6 V. (b) C<sub>2</sub> formation rate of R-Cu<sub>1</sub>/Cu<sub>NP</sub>, M-Cu<sub>1</sub>/Cu<sub>NP</sub> and P-Cu<sub>1</sub>/Cu<sub>NP</sub> in different concentrations KOH electrolyte at -0.6 V and Rate<sub>M</sub>/Rate<sub>P</sub> of M-Cu<sub>1</sub>/Cu<sub>NP</sub> to P-Cu<sub>1</sub>/Cu<sub>NP</sub>. Values are means and error bars indicate s.d. ( $n = 3$  replicates).

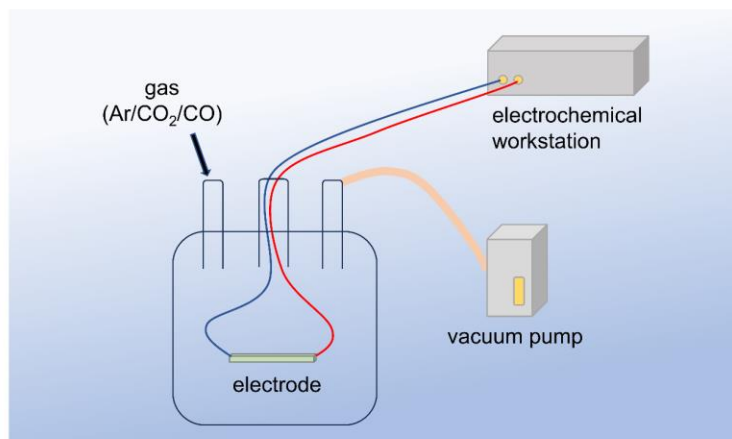

**Figure S22.** The device scheme of gas electro-response experiments.

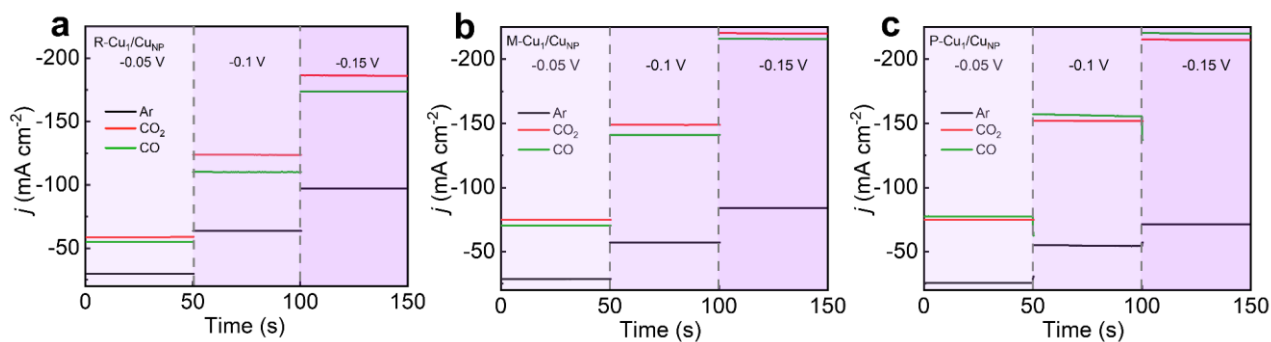

**Figure S23.** The CO<sub>2</sub> and CO gas adsorption electroresponse current density of (a) R-Cu<sub>1</sub>/Cu<sub>NP</sub>, (b) M-Cu<sub>1</sub>/Cu<sub>NP</sub> and (c) P-Cu<sub>1</sub>/Cu<sub>NP</sub>.

The capacity adsorption of CO<sub>2</sub> and CO molecules on the catalysts surface was tested by a self-designed gas adsorption electroresponse device. The Cu foam sprayed with the catalyst was used as electrode. The as-prepared electrode was placed in a sealed container and connected with the electrochemical workstation. Various gas (CO<sub>2</sub>, CO and Ar) were injected into the container and the curve of current was monitored under different applied potentials (-0.05, -0.1 and -0.15 V).



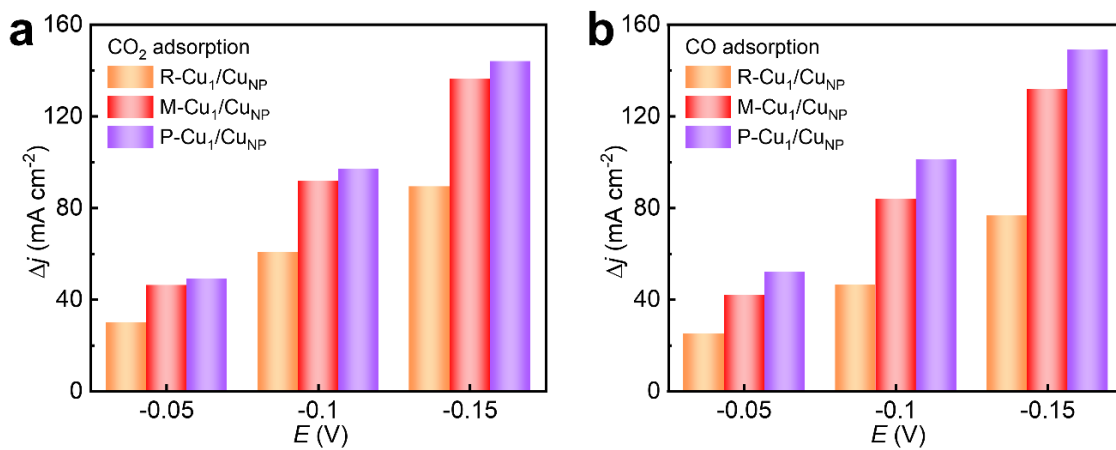

**Figure S24.** Results of (a) CO<sub>2</sub> and (b) CO adsorption responses under different applied voltages over R-Cu<sub>1</sub>/Cu<sub>NP</sub>, M-Cu<sub>1</sub>/Cu<sub>NP</sub> and P-Cu<sub>1</sub>/Cu<sub>NP</sub>.

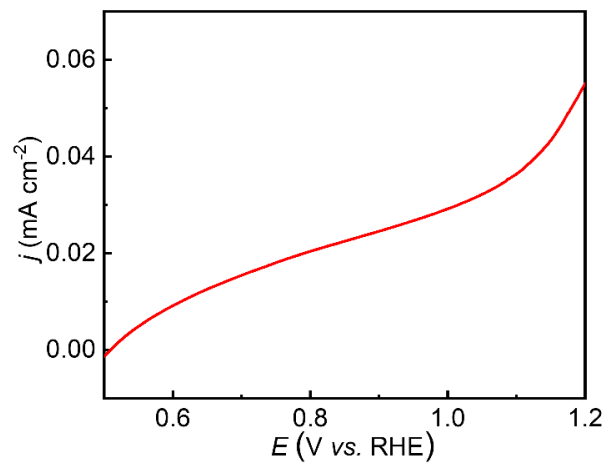

**Figure S25.** The LSV curve of M-Cu<sub>1</sub>/Cu<sub>NP</sub> in 0.1 M Na<sub>2</sub>SO<sub>4</sub> aqueous solution without CO adsorption.

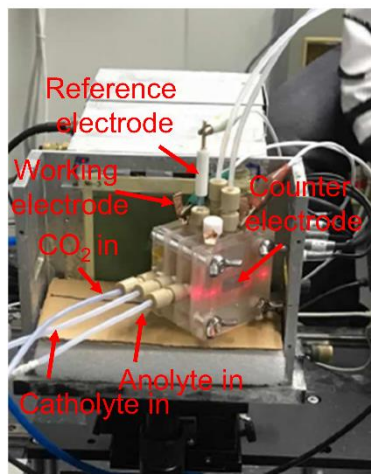

**Figure S26.** The optical photo of flow cell used for *in situ* XAS experiment.

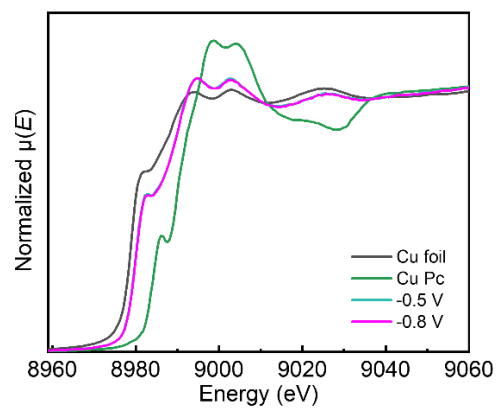

**Figure S27.** The *in situ* XANES spectra at Cu K-edge over M-Cu<sub>1</sub>/Cu<sub>NP</sub> at -0.5 and -0.8 V in 5 M KOH electrolyte.

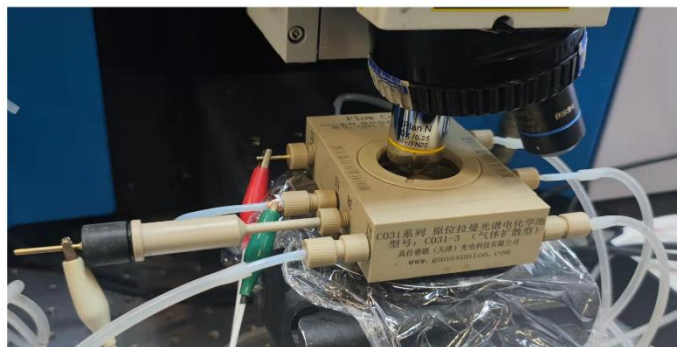

**Figure S28.** The photograph of cell used for *in situ* SERS spectroscopy.

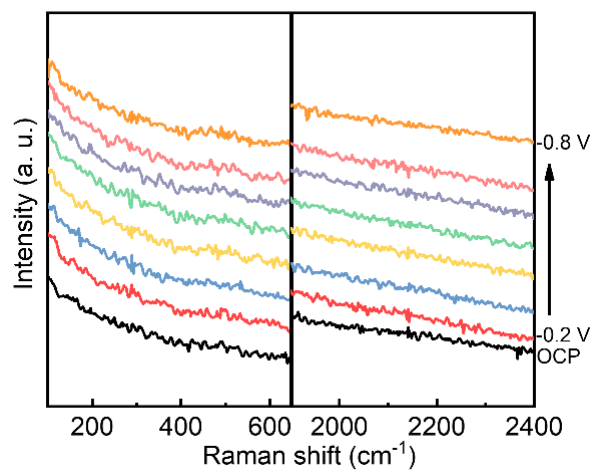

**Figure S29.** *In situ* surface-enhanced Raman spectra recorded at different applied potentials for Cu-N-C during  $\text{CO}_2\text{RR}$ .

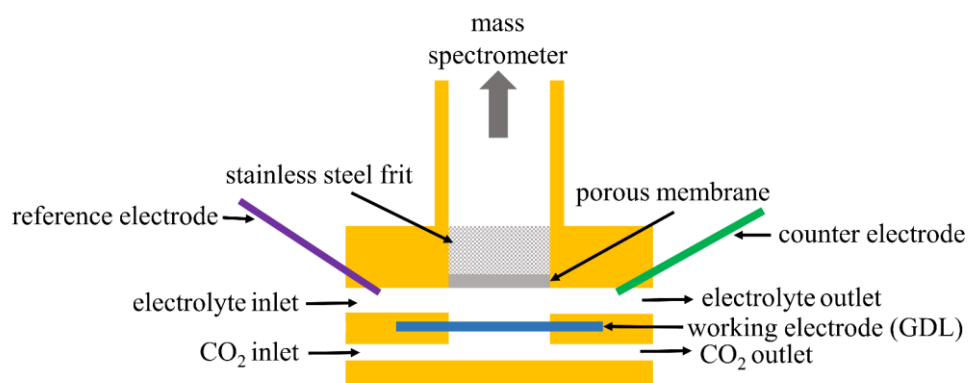

**Figure S30.** The scheme of cell used for online DEMS measurements.

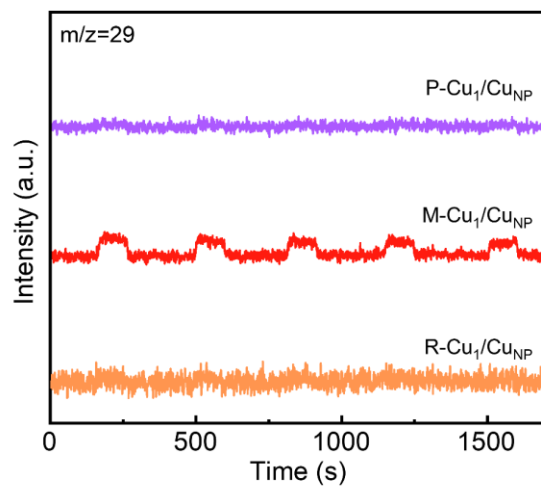

**Figure S31.** The  $m/z$  signal of 29 of P-Cu<sub>1</sub>/Cu<sub>NP</sub>, M-Cu<sub>1</sub>/Cu<sub>NP</sub> and R-Cu<sub>1</sub>/Cu<sub>NP</sub> during online DEMS measurements for CO<sub>2</sub>RR at -0.6 V in five continuous cycles in 5 M KOH electrolyte.



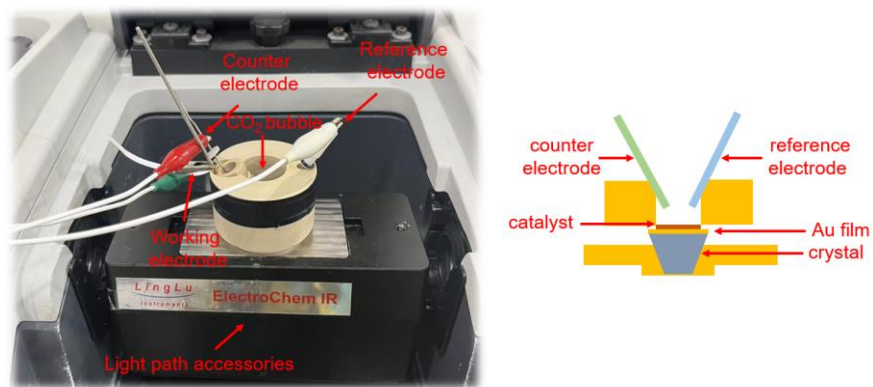

**Figure S32.** The photograph and scheme of cell used for *in situ* ATR-SEIRAS spectroscopy.

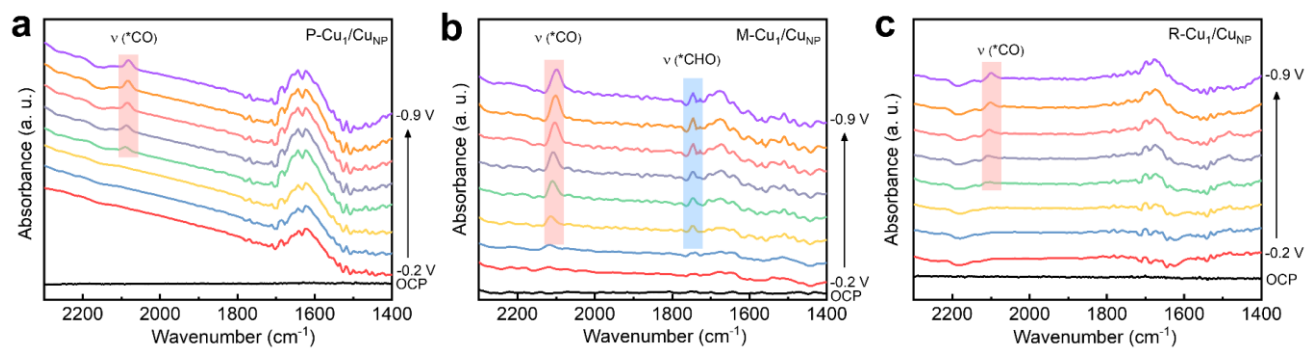

**Figure S33.** *In situ* ATR-SEIRAS spectra recorded at different applied potentials for (a) P-Cu<sub>1</sub>/Cu<sub>NP</sub>, (b) M-Cu<sub>1</sub>/Cu<sub>NP</sub> and (c) R-Cu<sub>1</sub>/Cu<sub>NP</sub> during CO<sub>2</sub>RR in CO<sub>2</sub>-saturated 3 M KOH electrolyte.

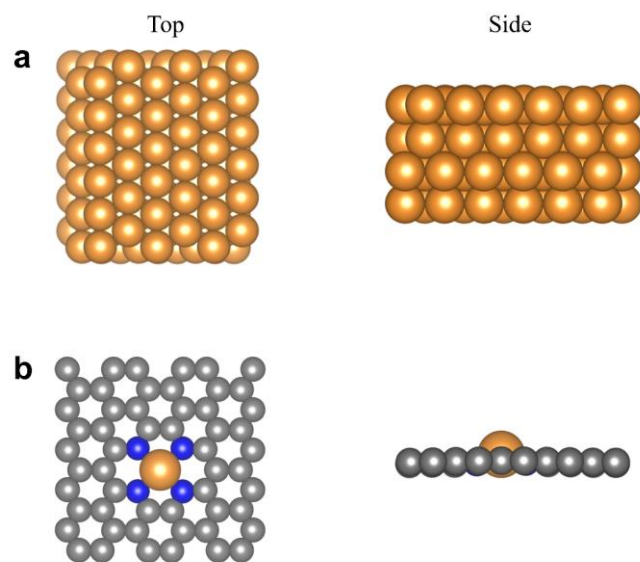

**Figure S34.** The top and side views of (a) Cu(111) and (b) Cu-N<sub>4</sub> models.

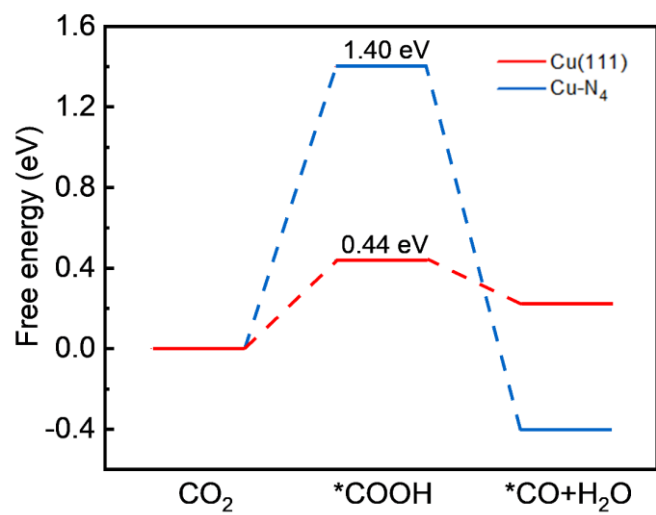

**Figure S35.** The free energy diagram for CO<sub>2</sub>RR to describe the activation of CO<sub>2</sub> over Cu(111) and Cu-N<sub>4</sub>.

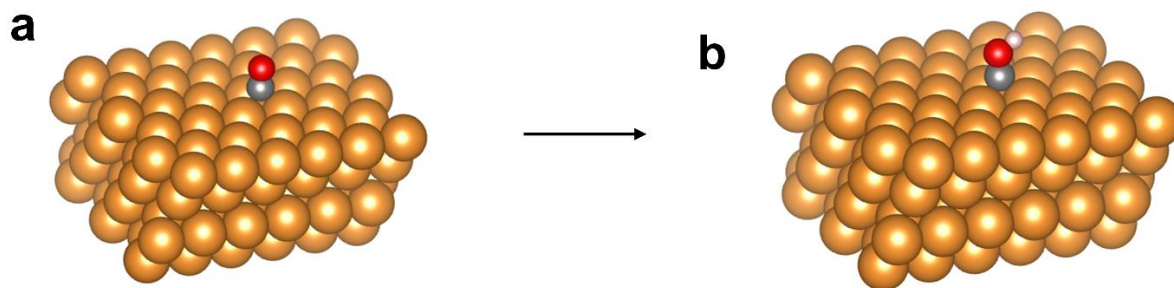

**Figure S36.** Side views of (a) \*CO and (b) \*COH on the Cu(111) facet.

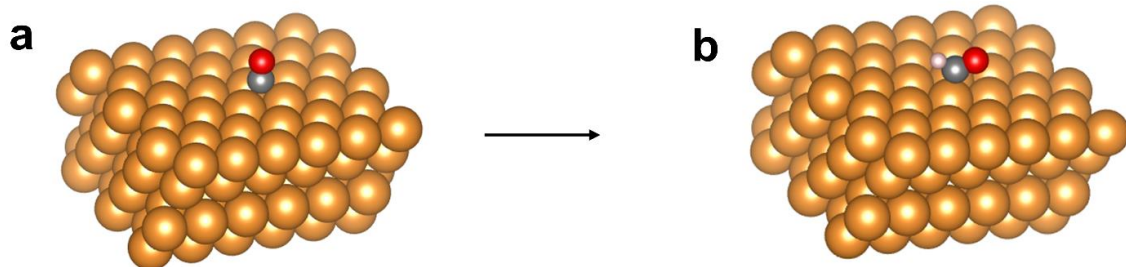

**Figure S37.** Side views of (a) \*CO and (b) \*CHO on the Cu(111) facet.

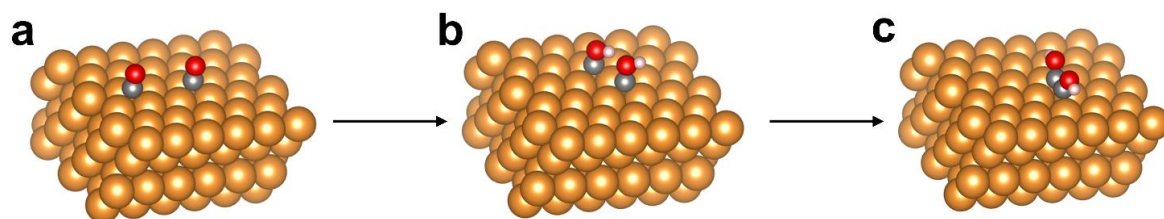

**Figure S38.** Side views of (a)  $^*CO-^*CO$ , (b)  $^*COH-^*COH$  and (c)  $^*COH^*COH$  on the Cu(111) facet.

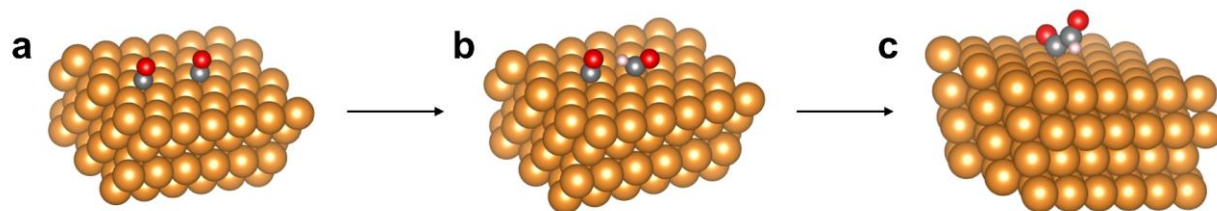

**Figure S39.** Side views of (a)  $^*CO-^*CO$ , (b)  $^*CO-^*CHO$  and (c)  $O^*CCHO$  on the Cu(111) facet.



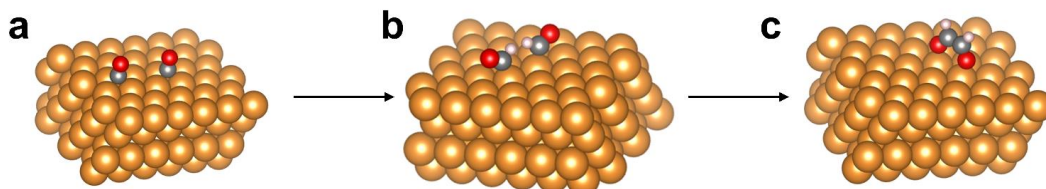

**Figure S40.** Side views of (a) \*CO-\*CO, (b) \*CHO-\*CHO and (c) \*OHCCHO\* on the Cu(111) facet.

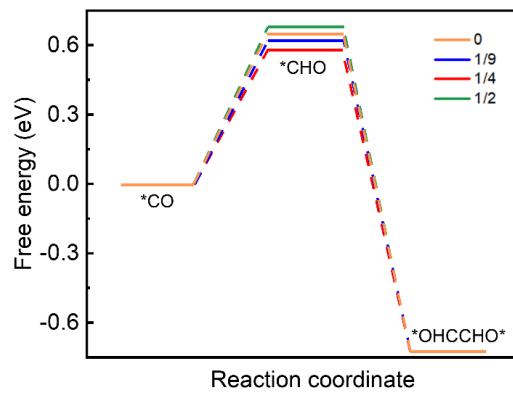

**Figure S41.** Free energy of \*CO hydrogenation to \*CHO on Cu(111) under different \*H coverage.

**Table S1.** The contents of Cu, N and C of the catalysts measured by XPS

| Sample                              | Cu at% | N at% | C at% |
|-------------------------------------|--------|-------|-------|
| P-Cu <sub>1</sub> /Cu <sub>NP</sub> | 7.4    | 33.5  | 59.1  |
| M-Cu <sub>1</sub> /Cu <sub>NP</sub> | 4.3    | 40.5  | 55.2  |
| R-Cu <sub>1</sub> /Cu <sub>NP</sub> | 1.9    | 47.2  | 50.9  |

**Table S2.** Structural parameters extracted from the EXAFS fitting. ( $S_0^2=0.80$ )

| Sample                              | Scattering pair | CN <sub>real</sub> | R(Å)  | $\sigma^2(10^{-3}\text{Å}^2)$ | $\Delta E_0(\text{eV})$ | P (%)                  |
|-------------------------------------|-----------------|--------------------|-------|-------------------------------|-------------------------|------------------------|
| R-Cu <sub>1</sub> /Cu <sub>NP</sub> | Cu-N            | 3.9                | 1.96  | 5.8                           | -3.5                    | 28 (Cu <sub>1</sub> )  |
|                                     | Cu-Cu           | 8.6                | 2.56* | 4.9                           | 2.1                     | 72 (Cu <sub>NP</sub> ) |
| M-Cu <sub>1</sub> /Cu <sub>NP</sub> | Cu-N            | 3.8                | 1.96  | 5.1                           | -3.4                    | 20 (Cu <sub>1</sub> )  |
|                                     | Cu-Cu           | 8.6                | 2.56* | 5.4                           | 2.1                     | 80 (Cu <sub>NP</sub> ) |
| P-Cu <sub>1</sub> /Cu <sub>NP</sub> | Cu-N            | 0.4                | 1.96  | 6.0                           | -3.5                    | 5 (Cu <sub>1</sub> )   |
|                                     | Cu-Cu           | 8.4                | 2.56* | 4.8                           | 2.1                     | 95 (Cu <sub>NP</sub> ) |
| Cu-N-C                              | Cu-N            | 4.0                | 1.96  | 5.9                           | -3.5                    | -                      |

$S_0^2$  is the amplitude reduction factor  $S_0^2=0.8$ ; CN<sub>real</sub> is the coordination number; R is interatomic distance (the bond length between central atoms and surrounding coordination atoms);  $\sigma^2$  is Debye-Waller factor (a measure of thermal and static disorder in absorber-scatterer distances);  $\Delta E_0$  is edge-energy shift (the difference between the zero kinetic energy value of the sample and that of the theoretical model). R factor is used to value the goodness of the fitting. \* represents a fixed value for the parameter. P represents the percentage of Cu-N<sub>4</sub> (Cu<sub>1</sub>) and Cu NPs Cu in total Cu species of catalyst.

**Table S3.** Product FEs, total current density and error bar of R-Cu<sub>1</sub>/Cu<sub>NP</sub> at various potentials in 5 M KOH electrolyte.

| Potential (V) | C <sub>2</sub> H <sub>5</sub> OH FE (%) |      |      | Error bar |
|---------------|-----------------------------------------|------|------|-----------|
| -0.4          | 0.0                                     | 0.0  | 0.0  | 0.00      |
| -0.5          | 0.0                                     | 0.0  | 0.0  | 0.00      |
| -0.6          | 14.8                                    | 11.3 | 7.0  | 3.90      |
| -0.7          | 17.2                                    | 21.6 | 19.2 | 2.20      |
| -0.8          | 9.0                                     | 11.7 | 6.4  | 2.65      |
| -0.9          | 6.3                                     | 7.1  | 7.5  | 0.61      |

| Potential (V) | CH <sub>3</sub> COOH FE (%) |      |      | Error bar |
|---------------|-----------------------------|------|------|-----------|
| -0.4          | 0.0                         | 0.0  | 0.0  | 0.00      |
| -0.5          | 0.0                         | 0.0  | 0.0  | 0.00      |
| -0.6          | 5.5                         | 8.2  | 6.8  | 1.35      |
| -0.7          | 12.7                        | 12.0 | 13.7 | 0.85      |
| -0.8          | 3.8                         | 5.7  | 4.7  | 0.95      |
| -0.9          | 2.8                         | 3.3  | 3.7  | 0.45      |

| Potential (V) | C <sub>2</sub> H <sub>4</sub> FE (%) |     |      | Error bar |
|---------------|--------------------------------------|-----|------|-----------|
| -0.4          | 0.0                                  | 0.0 | 0.0  | 0.00      |
| -0.5          | 7.6                                  | 7.7 | 7.9  | 0.15      |
| -0.6          | 9.1                                  | 9.5 | 9.2  | 0.21      |
| -0.7          | 9.6                                  | 8.5 | 10.6 | 1.05      |
| -0.8          | 4.8                                  | 4.5 | 4.5  | 0.17      |
| -0.9          | 3.2                                  | 4.4 | 4.0  | 0.61      |

| Potential (V) | HCOOH FE (%) |      |      | Error bar |
|---------------|--------------|------|------|-----------|
| -0.4          | 0.0          | 0.0  | 0.0  | 0.00      |
| -0.5          | 17.4         | 17.1 | 16.4 | 0.51      |
| -0.6          | 4.1          | 6.7  | 5.5  | 1.30      |
| -0.7          | 2.7          | 2.1  | 3.0  | 0.46      |
| -0.8          | 0.5          | 0.7  | 0.6  | 0.10      |
| -0.9          | 0.5          | 0.6  | 0.7  | 0.10      |

| Potential (V) | CO FE (%) |      |      | Error bar |
|---------------|-----------|------|------|-----------|
| -0.4          | 22.3      | 23.1 | 21.4 | 0.85      |
| -0.5          | 23.1      | 22.8 | 23   | 0.15      |
| -0.6          | 7.9       | 10.8 | 9.2  | 1.45      |
| -0.7          | 4         | 4.5  | 5.1  | 0.55      |
| -0.8          | 0.8       | 1.8  | 1.2  | 0.50      |
| -0.9          | 1.2       | 1.6  | 0.9  | 0.35      |

| Potential (V) | CH <sub>4</sub> FE (%) |      |      | Error bar |
|---------------|------------------------|------|------|-----------|
| -0.4          | 0.0                    | 0.0  | 0.0  | 0.00      |
| -0.5          | 2.8                    | 2.2  | 2.4  | 0.31      |
| -0.6          | 19.4                   | 18.6 | 20.0 | 0.70      |
| -0.7          | 22.6                   | 24.0 | 22.9 | 0.74      |
| -0.8          | 17.8                   | 21.3 | 20.0 | 1.77      |
| -0.9          | 13.7                   | 20.5 | 17.5 | 3.41      |

| Potential (V) | H <sub>2</sub> FE (%) |      |      | Error bar |
|---------------|-----------------------|------|------|-----------|
| -0.4          | 71.8                  | 73.7 | 74.0 | 1.19      |
| -0.5          | 51.1                  | 52.7 | 52.1 | 0.81      |
| -0.6          | 40.2                  | 39.5 | 40.1 | 0.38      |
| -0.7          | 30.9                  | 28.5 | 26.6 | 2.15      |
| -0.8          | 64.8                  | 54.2 | 59.8 | 5.30      |
| -0.9          | 76.4                  | 64.0 | 70.5 | 6.20      |

| Potential (V) | Total current density (mA cm <sup>-2</sup> ) |       |       | Error bar |
|---------------|----------------------------------------------|-------|-------|-----------|
| -0.4          | 5.7                                          | 6.2   | 6.0   | 0.25      |
| -0.5          | 21.3                                         | 22.9  | 19.8  | 1.55      |
| -0.6          | 81.1                                         | 82.3  | 81.5  | 0.60      |
| -0.7          | 191.0                                        | 187.0 | 189.0 | 2.00      |
| -0.8          | 493.2                                        | 487.0 | 497.2 | 5.14      |
| -0.9          | 798.0                                        | 787.0 | 792.0 | 5.51      |

**Table S4.** Product FEs, total current density and error bar of M-Cu<sub>1</sub>/Cu<sub>NP</sub> at various potentials in 5 M KOH electrolyte.

| Potential (V) | C <sub>2</sub> H <sub>5</sub> OH FE (%) |      |      | Error bar |
|---------------|-----------------------------------------|------|------|-----------|
| -0.4          | 0                                       | 0    | 0    | 0         |
| -0.5          | 10.8                                    | 15.3 | 14   | 2.30      |
| -0.6          | 30.1                                    | 29.2 | 29   | 0.59      |
| -0.7          | 27                                      | 28   | 28   | 0.58      |
| -0.8          | 24.1                                    | 23.9 | 23.6 | 0.25      |
| -0.9          | 19.6                                    | 19.9 | 19   | 0.46      |

| Potential (V) | CH <sub>3</sub> COOH FE (%) |      |      | Error bar |
|---------------|-----------------------------|------|------|-----------|
| -0.4          | 12.7                        | 13.1 | 10.9 | 1.17      |
| -0.5          | 18.3                        | 11.8 | 18   | 3.67      |
| -0.6          | 15.5                        | 14.4 | 20   | 2.97      |
| -0.7          | 17.7                        | 16.7 | 15.3 | 1.21      |
| -0.8          | 11.8                        | 13.1 | 10   | 1.56      |
| -0.9          | 7.2                         | 6.3  | 6.5  | 0.47      |

| Potential (V) | C <sub>2</sub> H <sub>4</sub> FE (%) |      |      | Error bar |
|---------------|--------------------------------------|------|------|-----------|
| -0.4          | 6.9                                  | 7.3  | 10.5 | 1.97      |
| -0.5          | 17.6                                 | 17.9 | 20.5 | 1.59      |
| -0.6          | 29.8                                 | 30.8 | 27.5 | 1.69      |
| -0.7          | 26.7                                 | 25.7 | 25.4 | 0.68      |
| -0.8          | 22.1                                 | 23.9 | 22.9 | 0.90      |
| -0.9          | 22.6                                 | 20.4 | 19.7 | 1.51      |

| Potential (V) | HCOOH FE (%) |     |     | Error bar |
|---------------|--------------|-----|-----|-----------|
| -0.4          | 8.6          | 8.9 | 9.2 | 0.30      |
| -0.5          | 12.5         | 7.5 | 7.9 | 2.78      |
| -0.6          | 2.4          | 3.1 | 2.5 | 0.38      |
| -0.7          | 3.5          | 2.2 | 2.3 | 0.72      |
| -0.8          | 1.5          | 2.1 | 1.5 | 0.35      |
| -0.9          | 1.2          | 2.7 | 3.2 | 1.04      |

| Potential (V) | CO FE (%) |      |      | Error bar |
|---------------|-----------|------|------|-----------|
| -0.4          | 35.3      | 35.6 | 30.4 | 2.92      |
| -0.5          | 23.7      | 27.8 | 22.4 | 2.82      |
| -0.6          | 10.1      | 11.3 | 10.7 | 0.60      |
| -0.7          | 7.4       | 5.4  | 5.3  | 1.18      |
| -0.8          | 3.2       | 3.4  | 4.7  | 0.81      |
| -0.9          | 4.1       | 3.6  | 4.5  | 0.45      |

| Potential (V) | CH <sub>4</sub> FE (%) |     |     | Error bar |
|---------------|------------------------|-----|-----|-----------|
| -0.4          | 0                      | 0   | 0   | 0.00      |
| -0.5          | 1.6                    | 1.3 | 1.9 | 0.30      |
| -0.6          | 2.2                    | 1.7 | 4.5 | 1.49      |
| -0.7          | 2.9                    | 7.3 | 5.3 | 2.20      |
| -0.8          | 4.9                    | 5.8 | 7.6 | 1.37      |
| -0.9          | 4.5                    | 3.7 | 2.2 | 1.17      |

| Potential (V) | H <sub>2</sub> FE (%) |      |      | Error bar |
|---------------|-----------------------|------|------|-----------|
| -0.4          | 37.4                  | 39.8 | 41.8 | 2.20      |
| -0.5          | 18.3                  | 20.9 | 17.8 | 1.66      |
| -0.6          | 11.1                  | 11.3 | 17.0 | 3.35      |
| -0.7          | 17.3                  | 17.7 | 22.6 | 2.95      |
| -0.8          | 33.8                  | 27.9 | 31.7 | 2.99      |
| -0.9          | 42.8                  | 46   | 45.3 | 1.68      |

| Potential (V) | Total current density (mA cm <sup>-2</sup> ) |        |        | Error bar |
|---------------|----------------------------------------------|--------|--------|-----------|
| -0.4          | 58.4                                         | 49.5   | 56.5   | 4.69      |
| -0.5          | 166.8                                        | 163.6  | 140    | 14.64     |
| -0.6          | 426                                          | 365.5  | 358.7  | 37.05     |
| -0.7          | 635.2                                        | 650.5  | 663.5  | 14.17     |
| -0.8          | 895.6                                        | 913.5  | 892.7  | 11.27     |
| -0.9          | 1211.83                                      | 1212.3 | 1198.8 | 7.66      |



**Table S5.** Product FEs, total current density and error bar of P-Cu<sub>1</sub>/Cu<sub>NP</sub> at various potentials in 5 M KOH electrolyte.

| Potential (V) | C <sub>2</sub> H <sub>5</sub> OH FE (%) |      |      | Error bar |
|---------------|-----------------------------------------|------|------|-----------|
| -0.4          | 0.0                                     | 0.0  | 0.0  | 0.00      |
| -0.5          | 0.0                                     | 0.0  | 0.0  | 0.00      |
| -0.6          | 13.4                                    | 12.3 | 12.6 | 0.57      |
| -0.7          | 14.2                                    | 16.0 | 15.2 | 0.90      |
| -0.8          | 14.5                                    | 13.1 | 11.6 | 1.45      |
| -0.9          | 12.2                                    | 10.2 | 13.9 | 1.85      |

| Potential (V) | CH <sub>3</sub> COOH FE (%) |      |      | Error bar |
|---------------|-----------------------------|------|------|-----------|
| -0.4          | 0.0                         | 0.0  | 0.0  | 0.00      |
| -0.5          | 3.5                         | 3.9  | 3.2  | 0.35      |
| -0.6          | 4.0                         | 4.5  | 5.1  | 0.55      |
| -0.7          | 10.0                        | 10.1 | 10.3 | 0.15      |
| -0.8          | 8.0                         | 7.2  | 7.5  | 0.40      |
| -0.9          | 8.3                         | 6.7  | 9.9  | 1.60      |

| Potential (V) | C <sub>2</sub> H <sub>4</sub> FE (%) |      |      | Error bar |
|---------------|--------------------------------------|------|------|-----------|
| -0.4          | 0.0                                  | 0.0  | 0.0  | 0.00      |
| -0.5          | 3.1                                  | 2.9  | 3.5  | 0.31      |
| -0.6          | 16.2                                 | 17.2 | 14.5 | 1.37      |
| -0.7          | 21.1                                 | 24.7 | 20.3 | 2.34      |
| -0.8          | 23.0                                 | 23.2 | 24.0 | 0.53      |
| -0.9          | 27.8                                 | 23.9 | 22.9 | 2.59      |

| Potential (V) | HCOOH FE (%) |      |      | Error bar |
|---------------|--------------|------|------|-----------|
| -0.4          | 42.0         | 45.0 | 44.0 | 1.53      |
| -0.5          | 30.1         | 32.2 | 31.0 | 1.05      |
| -0.6          | 13.4         | 14.6 | 15.0 | 0.83      |
| -0.7          | 5.7          | 5.7  | 5.7  | 0.00      |
| -0.8          | 5.7          | 3.9  | 4.5  | 0.92      |
| -0.9          | 4.2          | 4.5  | 4.0  | 0.25      |

| Potential (V) | CO FE (%) |      |      | Error bar |
|---------------|-----------|------|------|-----------|
| -0.4          | 10.6      | 11.4 | 13.0 | 1.22      |
| -0.5          | 16.9      | 14.1 | 17.0 | 1.65      |
| -0.6          | 16.9      | 17.0 | 20.4 | 1.99      |
| -0.7          | 16.5      | 13.2 | 14.7 | 1.65      |
| -0.8          | 12.0      | 11.1 | 13.5 | 1.21      |
| -0.9          | 11.6      | 10.8 | 12.2 | 0.70      |

| Potential (V) | CH <sub>4</sub> FE (%) |     |     | Error bar |
|---------------|------------------------|-----|-----|-----------|
| -0.4          | 0.0                    | 0.0 | 0.0 | 0.00      |
| -0.5          | 1.0                    | 1.2 | 1.4 | 0.20      |
| -0.6          | 4.5                    | 3.1 | 3.4 | 0.74      |
| -0.7          | 5.9                    | 5.1 | 6.2 | 0.57      |
| -0.8          | 4.5                    | 5.5 | 5.5 | 0.58      |
| -0.9          | 6.7                    | 6.6 | 6.5 | 0.10      |

| Potential (V) | H <sub>2</sub> FE (%) |      |      | Error bar |
|---------------|-----------------------|------|------|-----------|
| -0.4          | 45.6                  | 43.1 | 44.0 | 1.27      |
| -0.5          | 48.1                  | 53.1 | 51.1 | 2.52      |
| -0.6          | 30.5                  | 28.2 | 37.1 | 4.62      |
| -0.7          | 28.4                  | 28.0 | 28.5 | 0.26      |
| -0.8          | 31.5                  | 33.7 | 35.8 | 2.15      |
| -0.9          | 40.4                  | 38.1 | 40.5 | 1.36      |

| Potential (V) | Total current density (mA cm <sup>-2</sup> ) |       |       | Error bar |
|---------------|----------------------------------------------|-------|-------|-----------|
| -0.4          | 21.2                                         | 19.8  | 20.4  | 0.70      |
| -0.5          | 83.4                                         | 85.9  | 84.3  | 1.27      |
| -0.6          | 211.2                                        | 196.0 | 204.5 | 7.62      |
| -0.7          | 367.0                                        | 365.7 | 370.0 | 2.21      |
| -0.8          | 554.0                                        | 598.3 | 573.2 | 22.22     |
| -0.9          | 860.1                                        | 860.0 | 852.0 | 4.65      |

**Table S6.** Product FEs, total current density and error bar of Cu-N-C at various potentials in 5 M KOH electrolyte.

| Potential (V) | CO FE (%) |     |     | Error bar |
|---------------|-----------|-----|-----|-----------|
| -0.4          | 0         | 0   | 0   | 0         |
| -0.5          | 3.1       | 2.7 | 2.5 | 0.30      |
| -0.6          | 2.4       | 3.4 | 2.4 | 0.57      |
| -0.7          | 2         | 3.5 | 2   | 0.86      |
| -0.8          | 1.3       | 3.2 | 1.4 | 1.06      |
| -0.9          | 0         | 1.8 | 0   | 1.03      |

| Potential (V) | CH <sub>4</sub> FE (%) |     |     | Error bar |
|---------------|------------------------|-----|-----|-----------|
| -0.4          | 0                      | 0   | 0   | 0.00      |
| -0.5          | 2.7                    | 4.3 | 4.4 | 0.95      |
| -0.6          | 2.1                    | 7.8 | 4.4 | 2.87      |
| -0.7          | 3.2                    | 8.8 | 3.8 | 3.07      |
| -0.8          | 1.4                    | 8.6 | 2.7 | 3.84      |
| -0.9          | 0                      | 1.4 | 1.2 | 0.76      |

| Potential (V) | H <sub>2</sub> FE (%) |      |      | Error bar |
|---------------|-----------------------|------|------|-----------|
| -0.4          | 98.1                  | 98.2 | 98.5 | 0.21      |
| -0.5          | 93.8                  | 92.0 | 94.2 | 1.17      |
| -0.6          | 95.1                  | 87.8 | 93.3 | 3.80      |
| -0.7          | 95.4                  | 87.9 | 92.1 | 3.76      |
| -0.8          | 98.4                  | 87.4 | 95.7 | 5.73      |
| -0.9          | 99.8                  | 97.6 | 98.3 | 1.12      |

| Potential (V) | Total current density (mA cm <sup>-2</sup> ) |       |       | Error bar |
|---------------|----------------------------------------------|-------|-------|-----------|
| -0.4          | 33.3                                         | 32.6  | 27.9  | 2.95      |
| -0.5          | 81.1                                         | 64.7  | 73.7  | 8.19      |
| -0.6          | 114.3                                        | 99.0  | 101.8 | 8.14      |
| -0.7          | 153.2                                        | 136.4 | 149.4 | 8.82      |
| -0.8          | 196.2                                        | 168.2 | 187.0 | 14.26     |
| -0.9          | 249.2                                        | 228.3 | 241.0 | 10.52     |

**Table S7.** Performance comparison of various catalysts for CO<sub>2</sub> electroreduction to C<sub>2+</sub> products.

| Samples                             | E<br>(V vs. RHE) | FE <sub>C2+</sub><br>(%) | <i>j</i> <sub>C2+</sub><br>(mA cm <sup>-2</sup> ) | References |
|-------------------------------------|------------------|--------------------------|---------------------------------------------------|------------|
| M-Cu <sub>1</sub> /Cu <sub>NP</sub> | -0.60            | 75.4                     | 289.2                                             | This work  |
| Nanoporous Cu                       | -0.67            | 62.0                     | 404.8                                             | 1          |
| Reconstructed Cu                    | -1.80            | 77.0                     | 346.5                                             | 2          |
| NGQ/Cu-nr                           | -0.90            | ~74.0                    | ~208.0                                            | 3          |
| F-Cu                                | -0.89            | 80.0                     | 1280.0                                            | 4          |
| Multihollow Cu <sub>2</sub> O       | -0.61            | 75.0                     | 267.0                                             | 5          |
| CuAg wire                           | -0.70            | 85.0                     | 255.0                                             | 6          |
| FeTPP[Cl]/Cu                        | -0.82            | 85.0                     | 257.0                                             | 7          |
| OD-Cu-III                           | -                | 74.9                     | 224.7                                             | 8          |
| Cu dendrites                        | -0.68            | 64.0                     | 255.0                                             | 9          |
| Cu                                  | -                | 80.4                     | 120.6                                             | 10         |
| Cu(0)@PIL@Cuba(I)                   | -0.85            | 76.1                     | 304.2                                             | 11         |
| 3-shell HoMSs                       | -0.88            | 77.0                     | 513.7                                             | 12         |
| Cu-PTFE                             | -1.50            | 86.0                     | ~250.0                                            | 13         |
| CuS/Cu-V                            | -0.92            | 52.8                     | 147.8                                             | 14         |
| Ce(OH) <sub>x</sub> -doped-Cu       | -0.70            | 80.3                     | 211.2                                             | 15         |
| Cu-KI                               | -1.09            | ~72.6                    | 29.0                                              | 16         |
| Graphite/Cu/PTFE                    | -0.54            | 83.0                     | 275.0                                             | 17         |
| Polyamine-<br>incorporated Cu       | -0.47            | 87.0                     | ~35.0                                             | 18         |

## Supplementary References

1. Lv J. J. et al. A highly porous copper electrocatalyst for carbon dioxide reduction. *Adv. Mater.* **30**, 1803111 (2018).
2. Kibria M. G. et al. A surface reconstruction route to high productivity and selectivity in CO<sub>2</sub> electroreduction toward C<sub>2+</sub> hydrocarbons. *Adv. Mater.* **30**, 1804867 (2018).
3. Chen C. et al. Highly efficient electroreduction of CO<sub>2</sub> to C<sub>2+</sub> alcohols on heterogeneous dual active sites. *Angew. Chem. Int. Ed.* **59**, 16459-16464 (2020).
4. Ma W. et al. Electrocatalytic reduction of CO<sub>2</sub> to ethylene and ethanol through hydrogen-assisted C–C coupling over fluorine-modified copper. *Nat. Catal.* **3**, 478-487 (2020).
5. Yang P. P. et al. Protecting copper oxidation state via intermediate confinement for selective CO<sub>2</sub> electroreduction to C<sub>2+</sub> fuels. *J. Am. Chem. Soc.* **142**, 6400-6408 (2020).
6. Hoang T. T. H. et al. Nanoporous copper-silver alloys by additive-controlled electrodeposition for the selective electroreduction of CO<sub>2</sub> to ethylene and ethanol. *J. Am. Chem. Soc.* **140**, 5791-5797 (2018).
7. Li F. et al. Cooperative CO<sub>2</sub>-to-ethanol conversion via enriched intermediates at molecule–metal catalyst interfaces. *Nat. Catal.* **3**, 75-82 (2019).
8. Wu Z. Z. et al. Identification of Cu(100)/Cu(111) interfaces as superior active sites for CO dimerization during CO<sub>2</sub> electroreduction. *J. Am. Chem. Soc.* **144**, 259-269 (2022).
9. Niu Z. Z. et al. Hierarchical copper with inherent hydrophobicity mitigates electrode flooding for high-rate CO<sub>2</sub> electroreduction to multicarbon products. *J. Am. Chem. Soc.* **143**, 8011-8021 (2021).
10. Zhang X. et al. Selective and high current CO<sub>2</sub> electro-reduction to multicarbon products in near-neutral KCl electrolytes. *J. Am. Chem. Soc.* **143**, 3245-3255 (2021).
11. Xu B. H. et al. Highly efficient electrocatalytic CO<sub>2</sub> reduction to C<sub>2+</sub> products on a poly(ionic liquid)-based Cu(0)-Cu(I) tandem catalyst. *Angew. Chem. Int. Ed.* **61**, e202110657 (2021).
12. Liu C. et al. Nanoconfinement engineering over hollow multi-shell structured copper towards efficient electrocatalytical C-C coupling. *Angew. Chem. Int. Ed.* **61**, e202113498 (2021).
13. Yang B. et al. Accelerating CO<sub>2</sub> electroreduction to multicarbon products via synergistic electric-thermal field on copper nanoneedles. *J. Am. Chem. Soc.* **144**, 3039-3049 (2022).
14. Zhuang T.-T. et al. Steering post-C–C coupling selectivity enables high efficiency electroreduction of carbon dioxide to multi-carbon alcohols. *Nat. Catal.* **1**, 421-428 (2018).
15. Luo M. et al. Hydroxide promotes carbon dioxide electroreduction to ethanol on copper via tuning of adsorbed hydrogen. *Nat. Commun.* **10**, 5814 (2019).
16. Kim T. et al. A scalable method for preparing Cu electrocatalysts that convert CO<sub>2</sub> into C<sub>2+</sub> products. *Nat. Commun.* **11**, 3622 (2020).
17. Dinh C.-T. et al. CO<sub>2</sub> electroreduction to ethylene via hydroxide-mediated copper catalysis at an abrupt interface. *Science* **360**, 783-787 (2018).
18. Chen X. et al. Electrochemical CO<sub>2</sub>-to-ethylene conversion on polyamine-incorporated Cu electrodes. *Nat. Catal.* **4**, 20-27 (2020).
